# Supplementary material
Source: publisher figshare collection journal article supplement (https://acs.figshare.com/ndownloader/files/13687004)
Supplement: Supplementary file 1 [file 13687004]

Supporting Information for

Multilevel Approach for Direct VSCF/VCI  
MULTIMODE Calculations with Applications to  
Large “Zundel” Cations

*Jake A. Tan\* and Jer-Lai Kuo\**

Institute of Atomic and Molecular Sciences, Academia Sinica, No.1 Roosevelt Road, Section 4,  
Taipei 10617, Taiwan (ROC)

AUTHOR INFORMATION

**Corresponding Authors**

\* E-mails: [jaketan@gate.sinica.edu.tw](mailto:jaketan@gate.sinica.edu.tw) and [jlkuo@pub.iams.sinica.edu.tw](mailto:jlkuo@pub.iams.sinica.edu.tw)

## Table of Contents

|                                                                                    |    |
|------------------------------------------------------------------------------------|----|
| A. Generation of Gauss-Hermite Quadrature Points .....                             | 2  |
| B. Exact Fitting Procedure for the components of the 1MR intrinsic potential ..... | 5  |
| C. Optimized Geometry of $(\text{CH}_3\text{OH})_2\text{H}^+$ .....                | 6  |
| D. Grid Reductions in MULTIMODE .....                                              | 7  |
| E. Root Mean Square Fitting Error for 4MR-S $\alpha$ -FG ( $\alpha=1, 2$ ) .....   | 9  |
| F. Investigating the Idea of Using a Sparser Grid .....                            | 10 |
| G. Convergence of the VSCF-VCI frequencies with the nMR representation .....       | 11 |

### A. Generation of the Gauss-Hermite Quadrature Grid Points

Let  $\{\phi_n^s(Q_s)\}$  be the set of harmonic oscillator wave functions for the normal coordinate  $Q_s$ . For each

$Q_s$ , there exists a harmonic frequency  $\nu_s$ . The explicit form of  $\phi_n^s(Q_s)$  can be written as<sup>1</sup>

$$\phi_n^s(Q_s) = N_n H_n(\alpha_s Q_s) \exp\left(\frac{-\alpha_s^2 Q_s^2}{2}\right) \quad (\text{S.1})$$

$$N_n = \sqrt{\frac{\alpha_s}{2^n n! \sqrt{\pi}}}, \quad \alpha_s = \left(\frac{\omega_s}{\hbar}\right)^{\frac{1}{2}}$$

Where  $\omega_s$  is the angular frequency for normal mode  $Q_s$ , and  $\hbar$  is the reduced Planck constant. Let  $\mathbf{Q}_s$  be the matrix representation of  $Q_s$  in the  $\{\phi_n^s(Q_s)\}$  basis. For this case, the matrix elements  $(\mathbf{Q}_s)_{ij}$  is expressible in closed form.<sup>2</sup>

The diagonal elements are given by

$$\begin{aligned} (\mathbf{Q}_s)_{ii} &= \langle \phi_i^s | Q_s | \phi_i^s \rangle \\ &= N_i N_i \int_{-\infty}^{+\infty} H_i^s(\alpha_s Q_s) Q_s H_i^s(\alpha_s Q_s) \exp(-\alpha_s^2 Q_s^2) dQ_s \\ &= 0 \end{aligned} \quad (\text{S.2})$$

The product  $H_i^s(\alpha_s Q_s) H_i^s(\alpha_s Q_s) \exp(-\alpha_s^2 Q_s^2)$  will always be an even function, while  $Q_s$  is an odd function. Therefore, the above integrand is odd, and the integral vanishes. Meanwhile, the off-diagonal elements are given by

$$\begin{aligned} (\mathbf{Q}_s)_{ij} &= \langle \phi_i^s | Q_s | \phi_j^s \rangle \\ &= N_i N_j \int_{-\infty}^{+\infty} H_i^s(\alpha_s Q_s) Q_s H_j^s(\alpha_s Q_s) \exp(-\alpha_s^2 Q_s^2) dQ_s \end{aligned} \quad (\text{S.3})$$

The above integral is simplified thru the use of the following recursion equation.<sup>1</sup>

$$\xi H_j^s(\xi) = j H_{j-1}^s(\xi) + \frac{1}{2} H_{j+1}^s(\xi), \quad \xi \equiv \alpha_s Q_s \quad (\text{S.4})$$

The integral in Eq (S.3) then becomes,

$$\begin{aligned} (\mathbf{Q}_s)_{ij} &= \frac{N_i N_j}{\alpha_s^2} \int_{-\infty}^{+\infty} H_i^s(\xi) \left[ j H_{j-1}^s(\xi) + \frac{1}{2} H_{j+1}^s(\xi) \right] \exp(-\xi^2) d\xi \\ &= \frac{N_i N_j}{\alpha_s^2} \left\{ \begin{aligned} &2j \int_{-\infty}^{+\infty} H_i^s(\xi) H_{j-1}^s(\xi) \exp(-\xi^2) d\xi + \\ &\frac{1}{2} \int_{-\infty}^{+\infty} H_i^s(\xi) H_{j+1}^s(\xi) \exp(-\xi^2) d\xi \end{aligned} \right\} \end{aligned} \quad (\text{S.5})$$

Recall that for Hermite polynomials, the following orthogonality condition holds.<sup>1</sup>

$$\int_{-\infty}^{+\infty} H_n^s(\xi) H_m^s(\xi) \exp(-\xi^2) d\xi = \begin{cases} 2^n n! \sqrt{\pi} & n = m \\ 0 & n \neq m \end{cases} \quad (\text{S.6})$$

Hence the integral in Eq (S.5) vanishes unless  $i = j + 1$  or  $i = j - 1$ . Thus,  $\mathbf{Q}_s$  is a tridiagonal matrix. The principal diagonal is zero, and the upper and lower adjacent diagonals are non-zero. The non-zero matrix elements are then determined as follows.

For the case of  $i = j + 1$  we the have

$$\begin{aligned}
(\mathbf{Q}_s)_{j+1,j} &= \frac{N_{j+1}N_j}{\alpha_s^2} \left\{ \begin{aligned} &2j \int_{-\infty}^{+\infty} H_{j+1}^s(\xi) H_{j-1}^s(\xi) \exp(-\xi^2) d\xi + \\ &\frac{1}{2} \int_{-\infty}^{+\infty} H_{j+1}^s(\xi) H_{j+1}^s(\xi) \exp(-\xi^2) d\xi \end{aligned} \right\} \\
&= \frac{N_{j+1}N_{j+1}}{2\alpha_s^2} [2^{j+1} (j+1)! \sqrt{\pi}] \\
&= \frac{1}{\alpha_s} \sqrt{\frac{j+1}{2}} \\
&= \sqrt{\frac{\hbar(j+1)}{2\omega_s}}
\end{aligned} \tag{S.7}$$

Similarly, for the case of  $i = j-1$

$$\begin{aligned}
(\mathbf{Q}_s)_{j-1,j} &= \frac{N_{j-1}N_j}{2\alpha_s^2} \left\{ \begin{aligned} &2j \int_{-\infty}^{+\infty} H_{j-1}^s(\xi) H_{j-1}^s(\xi) \exp(-\xi^2) d\xi + \\ &\frac{1}{2} \int_{-\infty}^{+\infty} H_{j-1}^s(\xi) H_{j+1}^s(\xi) \exp(-\xi^2) d\xi \end{aligned} \right\} \\
&= \frac{N_{j-1}N_j}{2\alpha_s^2} (2j) [2^{j-1} (j-1)! \sqrt{\pi}] \\
&= \frac{1}{\alpha_s} \sqrt{\frac{j}{2}} \\
&= \sqrt{\frac{\hbar j}{2\omega_s}}
\end{aligned} \tag{S.8}$$

Where the definition of  $\alpha_s$  in Eq (S.1) has been used.

## B. Exact Fitting Procedure for the components of the 1MR intrinsic potential

Determining the  $a_n$  coefficients can be done thru standard methods of linear algebra. To elaborate this idea, let  $\{y_{s,i}, \bar{V}_s(y_{s,i})\}$  be the set of data points obtained thru direct-dynamics of the system. Using Eq (17) from the main text, a system of linear equations is formed.

$$\bar{V}_s(y_{s,i}) = \sum_{n=0}^{M-1} a_n y_{s,i}^n, \quad i = 1 \text{ to } M \quad (\text{S.9})$$

or in matrix form.

$$\begin{aligned} \bar{\mathbf{V}}_s &= \mathbf{Y}_s \mathbf{A}_s \\ \begin{bmatrix} \bar{V}_s(y_{s,1}) \\ \bar{V}_s(y_{s,2}) \\ \vdots \\ \bar{V}_s(y_{s,M}) \end{bmatrix} &= \begin{bmatrix} y_{s,1}^0 & y_{s,1} & y_{s,1}^2 & \cdots & y_{s,1}^{M-1} \\ y_{s,2}^0 & y_{s,2} & y_{s,2}^2 & \cdots & y_{s,2}^{M-1} \\ \vdots & \vdots & \vdots & \cdots & \vdots \\ y_{s,M}^0 & y_{s,M} & y_{s,M}^2 & \cdots & y_{s,M}^{M-1} \end{bmatrix} \begin{bmatrix} a_0 \\ a_1 \\ \vdots \\ a_{M-1} \end{bmatrix} \end{aligned} \quad (\text{S.10})$$

Provided that the matrix  $\mathbf{Y}_s$  is non-singular (i.e.  $\det \mathbf{Y}_s \neq 0$ ),  $\mathbf{Y}_s$  is an invertible matrix. Operating the matrix inverse  $\mathbf{Y}_s^{-1}$  yields the column vector containing the fitting coefficients.

$$\mathbf{A}_s = \begin{bmatrix} a_0 \\ a_1 \\ \vdots \\ a_{M-1} \end{bmatrix} = \mathbf{Y}_s^{-1} \bar{\mathbf{V}}_s \quad (\text{S.11})$$

Summing all the polynomials in the form of Eq (S.9) for all desired normal modes gives the 1-mode intrinsic potential  $\bar{V}^{(1)}$ .

### C. Optimized Geometry of $(\text{CH}_3\text{OH})_2\text{H}^+$ at MP2/aug-cc-pVDZ

The Cartesian coordinate in units of Bohr radius for the optimized geometry of MA conformer of  $(\text{CH}_3\text{OH})_2\text{H}^+$  obtained at MP2/aug-cc-pVDZ level of theory and basis.

| Charge = +1 | Multiplicity = 1 |              |              |  |
|-------------|------------------|--------------|--------------|--|
|             | X ( $a_0$ )      | Y ( $a_0$ )  | Z ( $a_0$ )  |  |
| H           | 2.61373866       | -1.86752298  | -2.045006273 |  |
| H           | -2.613738736     | 1.867521761  | -2.045006814 |  |
| H           | -4.696089687     | -1.948449331 | -0.70140699  |  |
| H           | 5.569979836      | -0.784249238 | 1.17772582   |  |
| H           | 4.696089713      | 1.948449154  | -0.701407123 |  |
| H           | 3.189853018      | 1.366605719  | 2.312004597  |  |
| H           | -3.189852968     | -1.366605819 | 2.312004673  |  |
| H           | -5.569979764     | 0.784249148  | 1.177725852  |  |
| H           | -0.000000048     | -0.000000085 | -0.705627562 |  |
| C           | 2.016142905      | -1.026576965 | -0.526571687 |  |
| C           | -2.016142984     | 1.026576871  | -0.526571855 |  |
| O           | 4.046099926      | 0.506576621  | 0.637012369  |  |
| O           | -4.046099871     | -0.506576746 | 0.637012433  |  |

## D. Grid Reduction in MULTIMODE via Symmetry Consideration

Here we describe in detail how the implementations in MULTIMODE significantly reduces the required number of grid points in constructing a 4MR potential for  $(\text{CH}_3\text{OH})_2\text{H}^+$ . We begin by describing the construction of the 1-mode intrinsic potential grids.

➤ 1-mode intrinsic potential grids

| Mode                      | Mode Symmetry | No. of Gauss-Hermite Points | Symmetry Considerations |
|---------------------------|---------------|-----------------------------|-------------------------|
| $Q_1$                     | A             | 16                          | 16                      |
| $Q_2$                     | B             | 16                          | 8                       |
| $Q_3$                     | B             | 16                          | 8                       |
| $Q_4$                     | B             | 16                          | 8                       |
| <b>Total no. of grids</b> |               | <b>64</b>                   | <b>40</b>               |

➤ 2-mode intrinsic potential grids

| Mode                      | Mode Symmetry | No. of HEG Points per Mode | No. of HEG points per 2-mode pair | Symmetry Considerations | Reduced no. of HEG points per 2-mode pair |
|---------------------------|---------------|----------------------------|-----------------------------------|-------------------------|-------------------------------------------|
| $Q_1 \& Q_2$              | A & B         | 10*10                      | 100                               | 10*10/2                 | 50                                        |
| $Q_1 \& Q_3$              | A & B         | 10*10                      | 100                               | 10*10/2                 | 50                                        |
| $Q_1 \& Q_4$              | A & B         | 10*10                      | 100                               | 10*10/2                 | 50                                        |
| $Q_2 \& Q_3$              | B & B         | 10*10                      | 100                               | 10*10/2                 | 50                                        |
| $Q_2 \& Q_4$              | B & B         | 10*10                      | 100                               | 10*10/2                 | 50                                        |
| $Q_3 \& Q_4$              | B & B         | 10*10                      | 100                               | 10*10/2                 | 50                                        |
| <b>Total no. of grids</b> |               |                            | <b>600</b>                        |                         | <b>300</b>                                |

➤ 3-mode intrinsic potential grids

| Mode                      | Mode Symmetry | No. of HEG Points per Mode | No. of HEG points per 3-mode group | Symmetry Considerations | Reduced no. of HEG points per 3-mode group | Further reduction using every other HEG grids |
|---------------------------|---------------|----------------------------|------------------------------------|-------------------------|--------------------------------------------|-----------------------------------------------|
| $Q_1 \& Q_2 \& Q_3$       | A & B & B     | 10*10*10                   | 1,000                              | $(10*10*10)/2$          | 500                                        | $(6*6*6)/2$                                   |
| $Q_1 \& Q_2 \& Q_4$       | A & B & B     | 10*10*10                   | 1,000                              | $(10*10*10)/2$          | 500                                        | $(6*6*6)/2$                                   |
| $Q_1 \& Q_3 \& Q_4$       | A & B & B     | 10*10*10                   | 1,000                              | $(10*10*10)/2$          | 500                                        | $(6*6*6)/2$                                   |
| $Q_2 \& Q_3 \& Q_4$       | B & B & B     | 10*10*10                   | 1,000                              | $(10*10*10)/2$          | 500                                        | $(6*6*6)/2$                                   |
| <b>Total no. of grids</b> |               |                            | <b>4,000</b>                       |                         | <b>2,000</b>                               | <b>432</b>                                    |

➤ 4-mode intrinsic potential grids

| Mode                       | Mode Symmetry | No. of HEG Points per Mode | No. of HEG points per 4-mode group | Symmetry Considerations | Reduced no. of HEG points per 4-mode group | Further reduction using every other HEG grids |
|----------------------------|---------------|----------------------------|------------------------------------|-------------------------|--------------------------------------------|-----------------------------------------------|
| $Q_1 \& Q_2 \& Q_3 \& Q_4$ | A & B & B & B | 10*10*10*10                | 10,000                             | $(10*10*10*10)/2$       | 5,000                                      | $(6*6*6*6)/2$                                 |
| <b>Total no. of grids</b>  |               |                            | <b>10,000</b>                      |                         | <b>5,000</b>                               | <b>648</b>                                    |



### E. Root Mean Square Error (RMSE) for the fits for 4MR-S $\alpha$ -FG ( $\alpha=1, 2$ )

The least squares fits were only performed for the components of the two-mode, three-mode, and four-mode intrinsic potentials. The RMSE in  $\text{cm}^{-1}$  are tabulated below.

| Components of the 2MR intrinsic potential                             |                       |                       |
|-----------------------------------------------------------------------|-----------------------|-----------------------|
| Two-mode grid                                                         | 4MR-S1-FG             | 4MR-S1-FG             |
| Q <sub>2</sub> and Q <sub>1</sub>                                     | 5.36                  | 5.38                  |
| Q <sub>3</sub> and Q <sub>1</sub>                                     | $8.68 \times 10^{-2}$ | $9.06 \times 10^{-2}$ |
| Q <sub>3</sub> and Q <sub>2</sub>                                     | 5.24                  | 5.25                  |
| Q <sub>4</sub> and Q <sub>1</sub>                                     | 0.10                  | $8.54 \times 10^{-2}$ |
| Q <sub>4</sub> and Q <sub>2</sub>                                     | 5.19                  | 5.21                  |
| Q <sub>4</sub> and Q <sub>3</sub>                                     | 0.10                  | $8.78 \times 10^{-2}$ |
| Components of the 3MR intrinsic potential                             |                       |                       |
| Three-mode grid                                                       |                       |                       |
| Q <sub>3</sub> , Q <sub>2</sub> , and Q <sub>1</sub>                  | 2.96                  | 2.43                  |
| Q <sub>4</sub> , Q <sub>2</sub> , and Q <sub>1</sub>                  | 2.18                  | 2.19                  |
| Q <sub>4</sub> , Q <sub>3</sub> , and Q <sub>1</sub>                  | $5.42 \times 10^{-2}$ | 0.67                  |
| Q <sub>4</sub> , Q <sub>3</sub> , and Q <sub>2</sub>                  | 1.89                  | 2.22                  |
| Components of the 4MR intrinsic potential                             |                       |                       |
| Four-mode grid                                                        |                       |                       |
| Q <sub>4</sub> , Q <sub>3</sub> , Q <sub>2</sub> , and Q <sub>1</sub> | 10.54                 | 6.63                  |

## F. Investigating the Idea of Using a Sparser Grid

The least squares fits were only performed for the components of the two-mode, three-mode, and four-mode intrinsic potentials. The RMS fitting error in  $\text{cm}^{-1}$  for the sparser grids are tabulated below.

| Components of the 3MR intrinsic potential<br>(Sparser Grid)           |            |            |
|-----------------------------------------------------------------------|------------|------------|
| Three-mode grid                                                       | 3MR-S1-SGB | 3MR-S2-SGB |
| Q <sub>3</sub> , Q <sub>2</sub> , and Q <sub>1</sub>                  | 21.68      | 21.71      |
| Q <sub>4</sub> , Q <sub>2</sub> , and Q <sub>1</sub>                  | 5.01       | 5.04       |
| Q <sub>4</sub> , Q <sub>3</sub> , and Q <sub>1</sub>                  | 0.11       | 0.11       |
| Q <sub>4</sub> , Q <sub>3</sub> , and Q <sub>2</sub>                  | 4.70       | 4.71       |
| Components of the 4MR intrinsic potential<br>(Sparser Grid)           |            |            |
| Four-mode grid                                                        | 4MR-S1-SGB | 4MR-S2-SGB |
| Q <sub>4</sub> , Q <sub>3</sub> , Q <sub>2</sub> , and Q <sub>1</sub> | 13.50      | 13.53      |

The 3MR and 4MR VSCF/VCI frequencies for the sets of potentials defined in Table 3, which are used to investigate the strategy of picking every other HEG grids. These potentials were built at the CCSD(T)/aug-cc-pVDZ//MP2/aug-cc-pVDZ level of theory and basis.

| Mode                                             | 3MR-S2       |                 | 4MR-S2       |                  |                  |
|--------------------------------------------------|--------------|-----------------|--------------|------------------|------------------|
|                                                  | FG           | SG <sup>a</sup> | FG           | SGA <sup>b</sup> | SGB <sup>c</sup> |
| <b>Intermolecular O-O stretch</b>                | 558.15       | 559.00          | 557.92       | 557.84           | 558.68           |
| <b>IHB stretch</b>                               | 863.88       | 864.05          | 863.97       | 863.83           | 863.79           |
| <b>Out-of-phase C-O stretch</b>                  | 992.97       | 995.84          | 992.73       | 992.56           | 995.39           |
| <b>Out-of-phase in-plane CH<sub>3</sub> rock</b> | 1097.14      | 1098.23         | 1095.86      | 1095.93          | 1096.77          |
| <b>Total number of grid points used</b>          | <b>2,340</b> | <b>772</b>      | <b>7,340</b> | <b>2,988</b>     | <b>1,420</b>     |

<sup>a</sup>Every other HEG points were used for the 3-mode intrinsic potential.

<sup>b</sup>Every other HEG points were used for the 4-mode intrinsic potential.

<sup>c</sup>Every other HEG points were used for the both 3-mode and 4-mode intrinsic potentials.

## G. Convergence of the VSCF/VCI frequencies with the nMR representation

The  $(\text{CH}_3\text{OH})_2\text{H}^+$  MP2/aug-cc-pVDZ harmonic frequencies (in  $\text{cm}^{-1}$ ) and MULTIMODE VSCF/VCI fundamental frequencies (in  $\text{cm}^{-1}$ ) for 1 to 4MR using the PES from cases S1-SGB and S2-SGB. It is evident that convergence is achieved at 3MR.

| S1-SGB         |                                               | MP2/aug-cc-pVDZ                      |         |         |         |         |                    |
|----------------|-----------------------------------------------|--------------------------------------|---------|---------|---------|---------|--------------------|
| Description    |                                               | Harmonic                             | 1-MR    | 2-MR    | 3-MR    | 4-MR    | Expt. <sup>3</sup> |
| Q <sub>1</sub> | Intermolecular O-O stretch                    | 577.37                               | 577.72  | 575.47  | 563.54  | 563.27  | ---                |
| Q <sub>2</sub> | IHB stretch                                   | 702.85                               | 1060.99 | 848.94  | 896.25  | 895.85  | 868                |
| Q <sub>3</sub> | Out-of-phase C-O stretch                      | 960.26                               | 970.23  | 1045.68 | 1010.06 | 1010.15 | 985                |
| Q <sub>4</sub> | Out-of-phase<br>in-plane CH <sub>3</sub> rock | 1092.34                              | 1101.20 | 1153.24 | 1117.20 | 1115.53 | 1107               |
| S2-SGB         |                                               | CCSD(T)/aug-cc-pVDZ//MP2/aug-cc-pVDZ |         |         |         |         |                    |
| Description    |                                               | Harmonic                             | 1-MR    | 2-MR    | 3-MR    | 4-MR    | Expt. <sup>3</sup> |
| Q <sub>1</sub> | Intermolecular O-O stretch                    | -                                    | 575.66  | 571.33  | 559.00  | 558.68  | ---                |
| Q <sub>2</sub> | IHB stretch                                   | -                                    | 1021.42 | 815.27  | 864.05  | 863.79  | 868                |
| Q <sub>3</sub> | Out-of-phase C-O stretch                      | -                                    | 969.12  | 1037.24 | 995.84  | 995.39  | 985                |
| Q <sub>4</sub> | Out-of-phase<br>in-plane CH <sub>3</sub> rock | -                                    | 1086.04 | 1132.21 | 1098.23 | 1096.77 | 1107               |

Note: The experimental values were taken from ref. 3 (see below). They are the highest peaks corresponding to each band in the triplet signature in the region 800-1200  $\text{cm}^{-1}$ .

## References

- (1) Pauling, L.; Wilson, E. B. *Introduction to Quantum Mechanics*; McGraw-Hill, 1935.
- (2) Atkins, P. W.; Friedman, R. S. *Molecular Quantum Mechanics*, 4th ed.; Oxford University Press: New York, 2005.
- (3) Roscioli, J. R.; McCunn, L. R.; Johnson, M. A. Quantum Structure of the Intermolecular Proton Bond. *Science* **2007**, *316* (5822), 249–254.
